# Supplementary material
Source: PubMed Central journal article supplement (PMC2880896)
Supplement: NIHMS199696-supplement-Supplemental.pdf [file NIHMS199696-supplement-Supplemental.pdf]

## Myeloperoxidase acts as a profibrotic mediator of atrial fibrillation

Volker Rudolph, René P. Andrié, Tanja K. Rudolph, Kai Friedrichs, Anna Klinke, Birgit Hirsch-Hoffmann, Alexander P. Schwoerer, Denise Lau, XiaoMing Fu, Karin Klingel, Karsten Sydow, Michael Didié, Anika Seniuk, Eike-Christin von Leitner, Katalin Szoecs, Jan W. Schrickel, Hendrik Treede, Ulrich Wenzel, Thorsten Lewalter, Georg Nickenig, Wolfram-Hubertus Zimmermann, Rainer H. Böger, Hermann Reichenspurner, Thomas Meinertz, Bruce A. Freeman, Thomas Eschenhagen, Heimo Ehmke, Stanley L. Hazen, Stephan Willems and Stephan Baldus

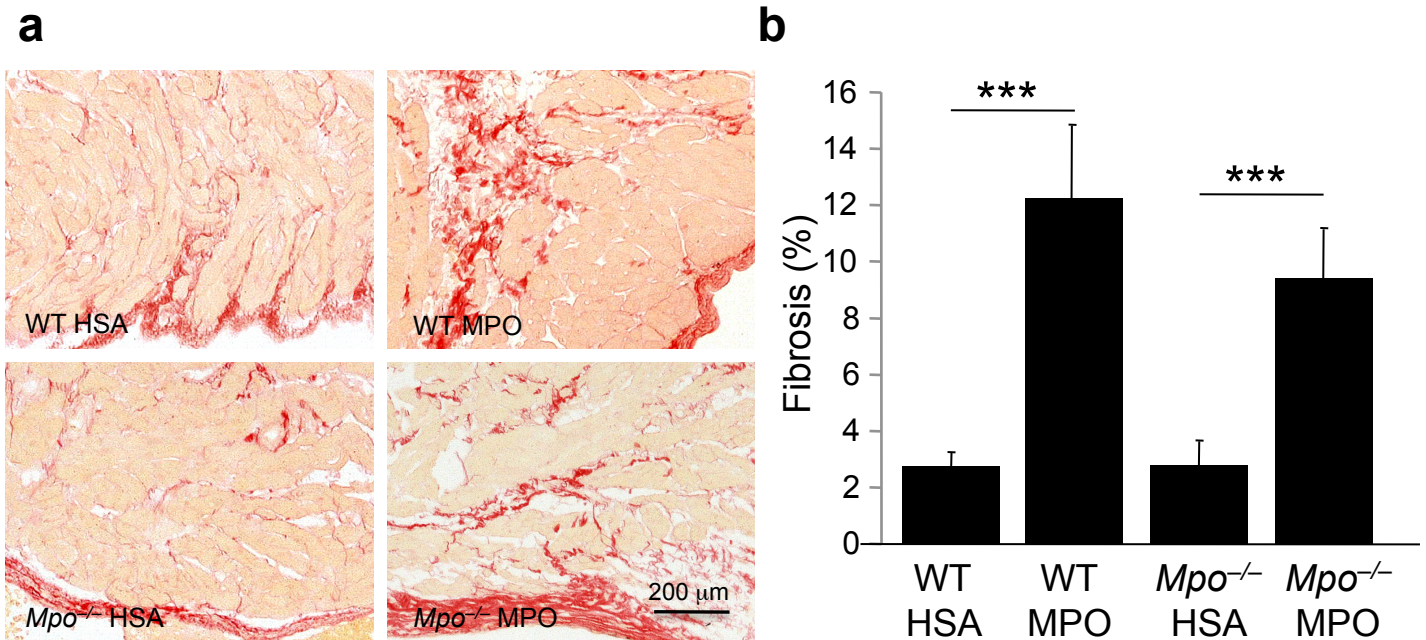

**Supplementary Figure 1.** Assessment of atrial fibrosis in WT and *Mpo*<sup>-/-</sup> mice following i.v. HSA or MPO treatment for 7 days. **(a)** Representative picrosirius red stained atria. **(b)** Quantitative analysis. N=6-8, \*\*\*P<0.001. ANOVA. All data are expressed as means ± standard deviation.

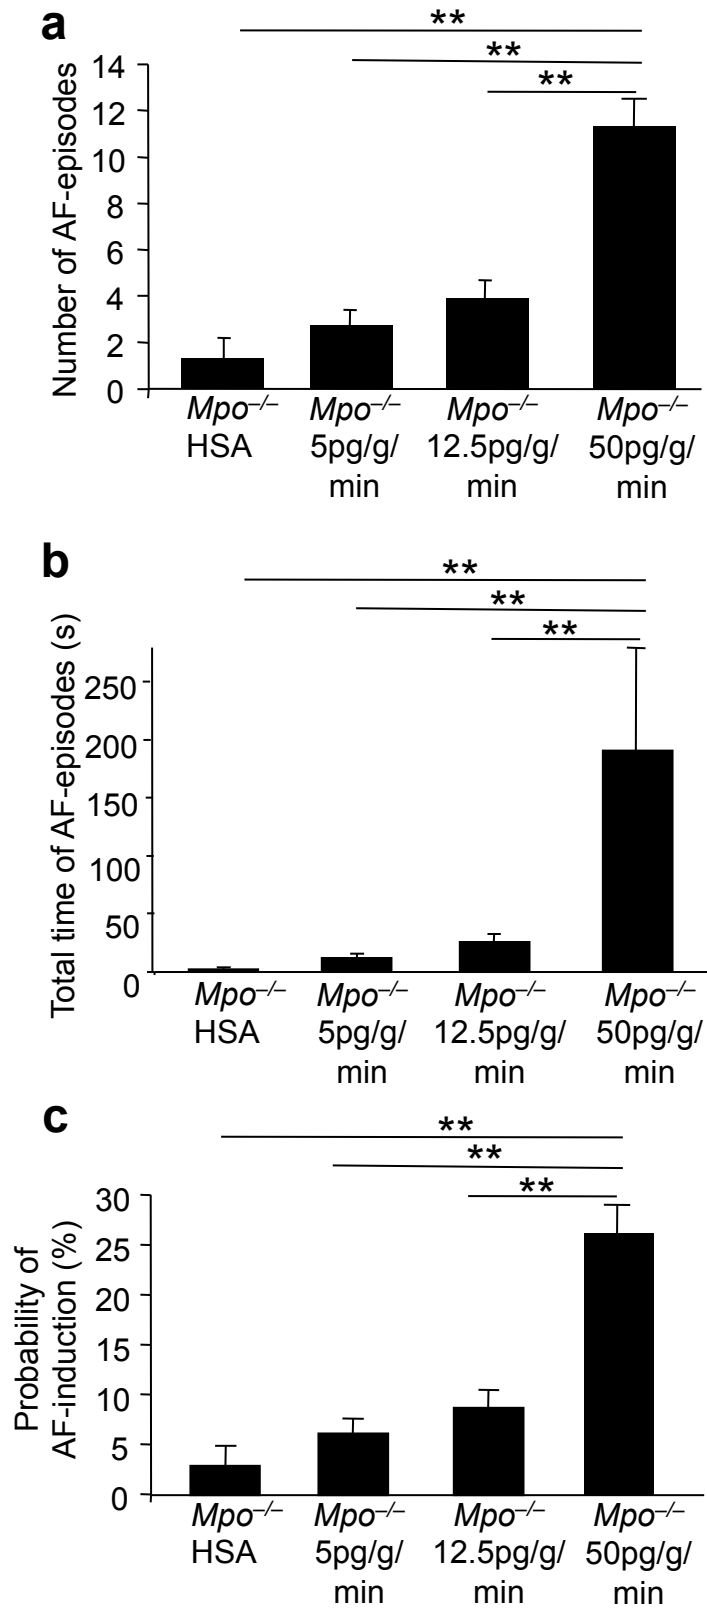

**Supplementary Figure 2.** see next page for figure legend.

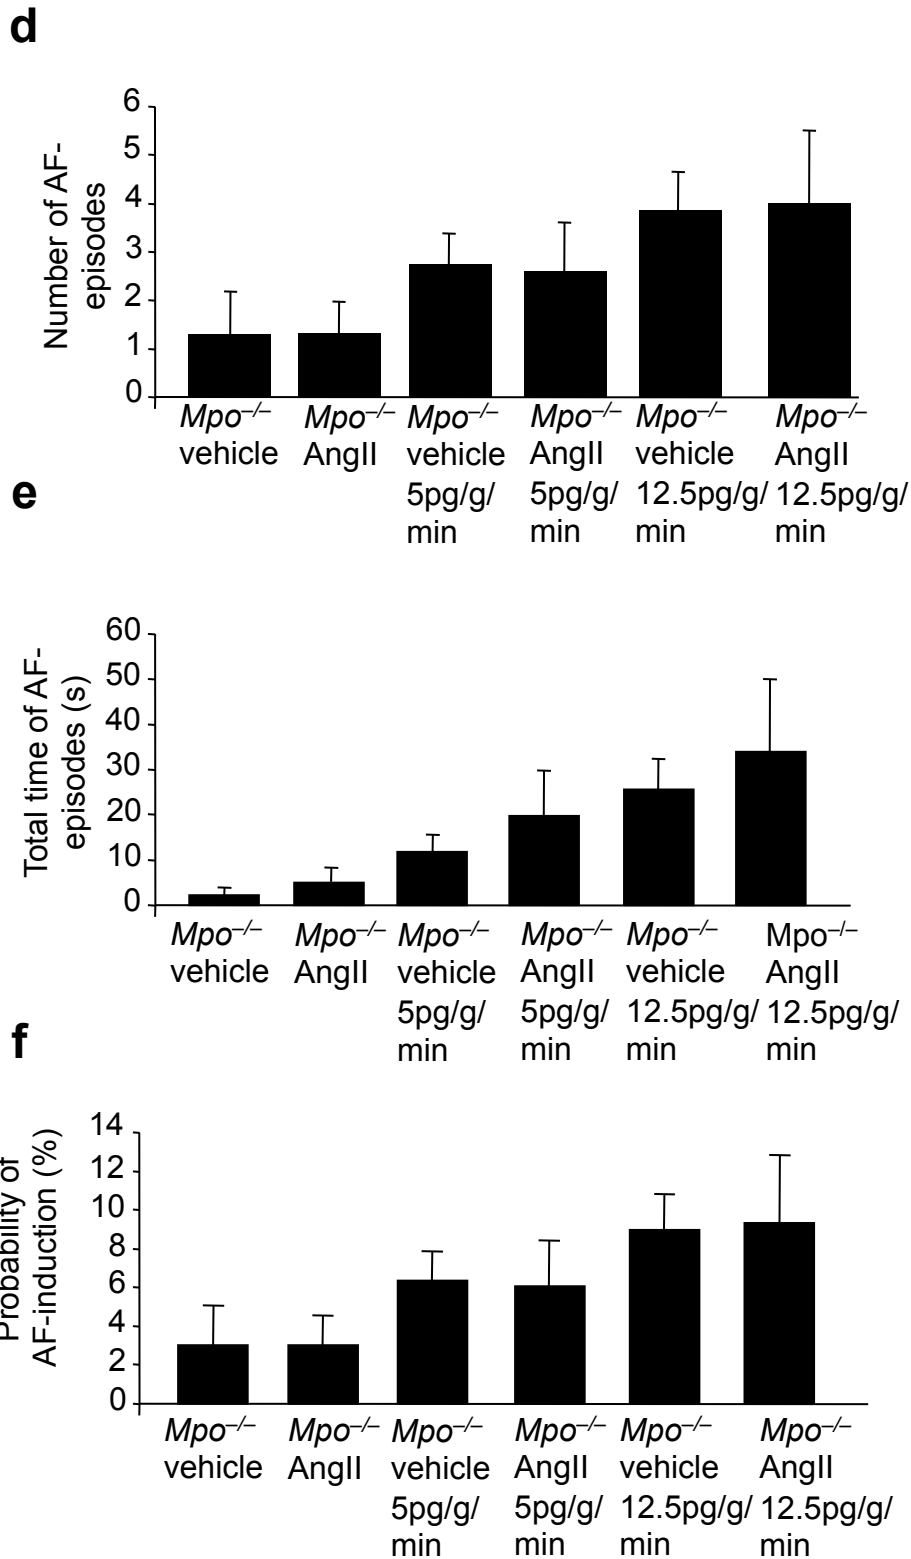

**Supplementary Figure 2.** Analysis of AF inducibility in *Mpo*<sup>-/-</sup> mice following 7 days of continuous i.v. MPO treatment in-vivo. MPO dose is given as pg/g body weight/min (n=10-15 per group). **(a)** Quantification of number of AF-episodes. \*\*P<0.001. P for trend: <0.001 **(b)** Total time of AF-episodes. \*\*P<0.001. P for trend: <0.001 **(c)** Probability of induction of AF. \*\*P<0.001. P for trend: <0.001. **(d-f)** No effect of Ang II on number of AF-episodes **(d)**, total time of AF-episodes **(e)** and probability of AF-induction **(f)** also at lower doses of MPO. All data are means ± standard deviation. ANOVA followed by Bonferroni post hoc test.

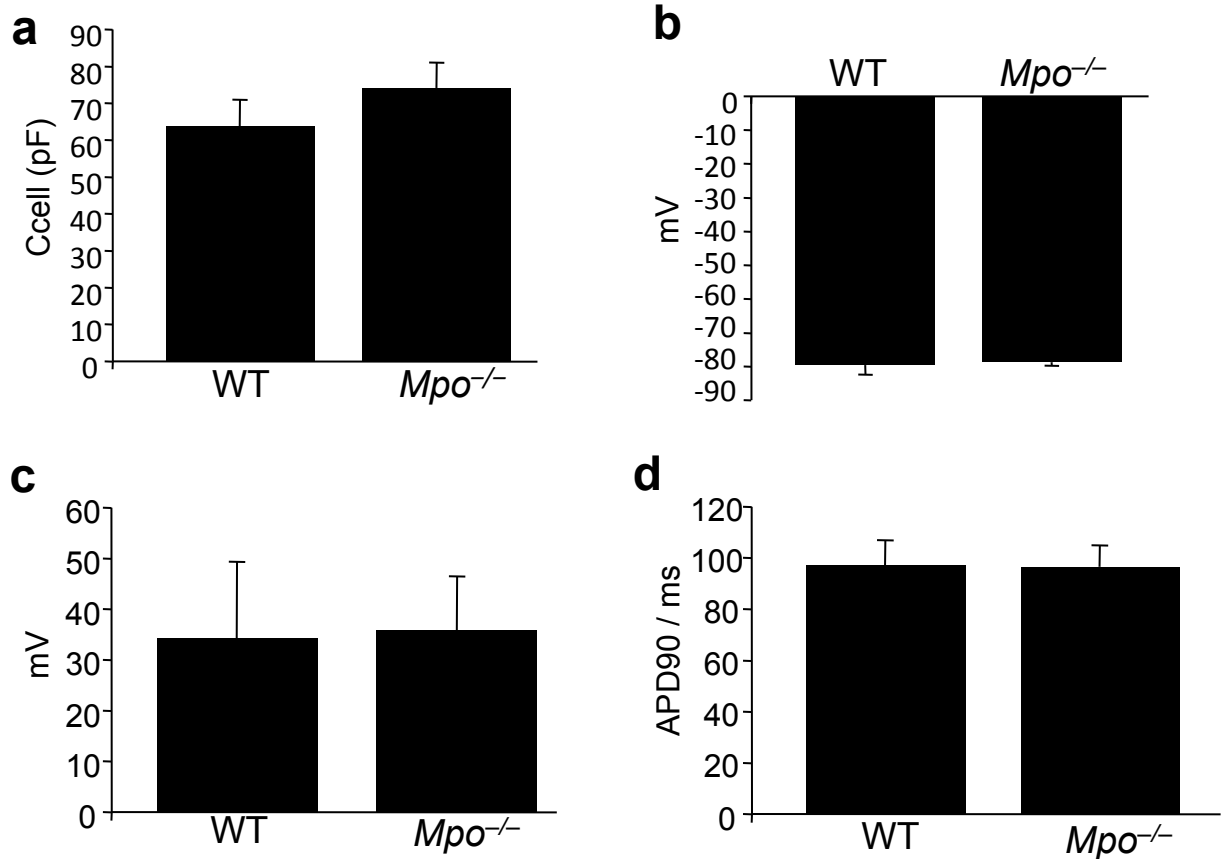

**Supplementary Figure 3.** Electrophysiological investigations in isolated cardiomyocytes. **(a)** Cell capacity (C<sub>cell</sub>) in cardiomyocytes isolated from untreated WT and *Mpo*<sup>-/-</sup> mice. **(b)** Quantification of resting membrane potential. **(c)** Overshoot in WT and *Mpo*<sup>-/-</sup> mice. **(d)** Duration of action potential at 90% repolarization (APD<sub>90</sub>). All data are expressed as means ± standard deviation. Unpaired Student's t-test.

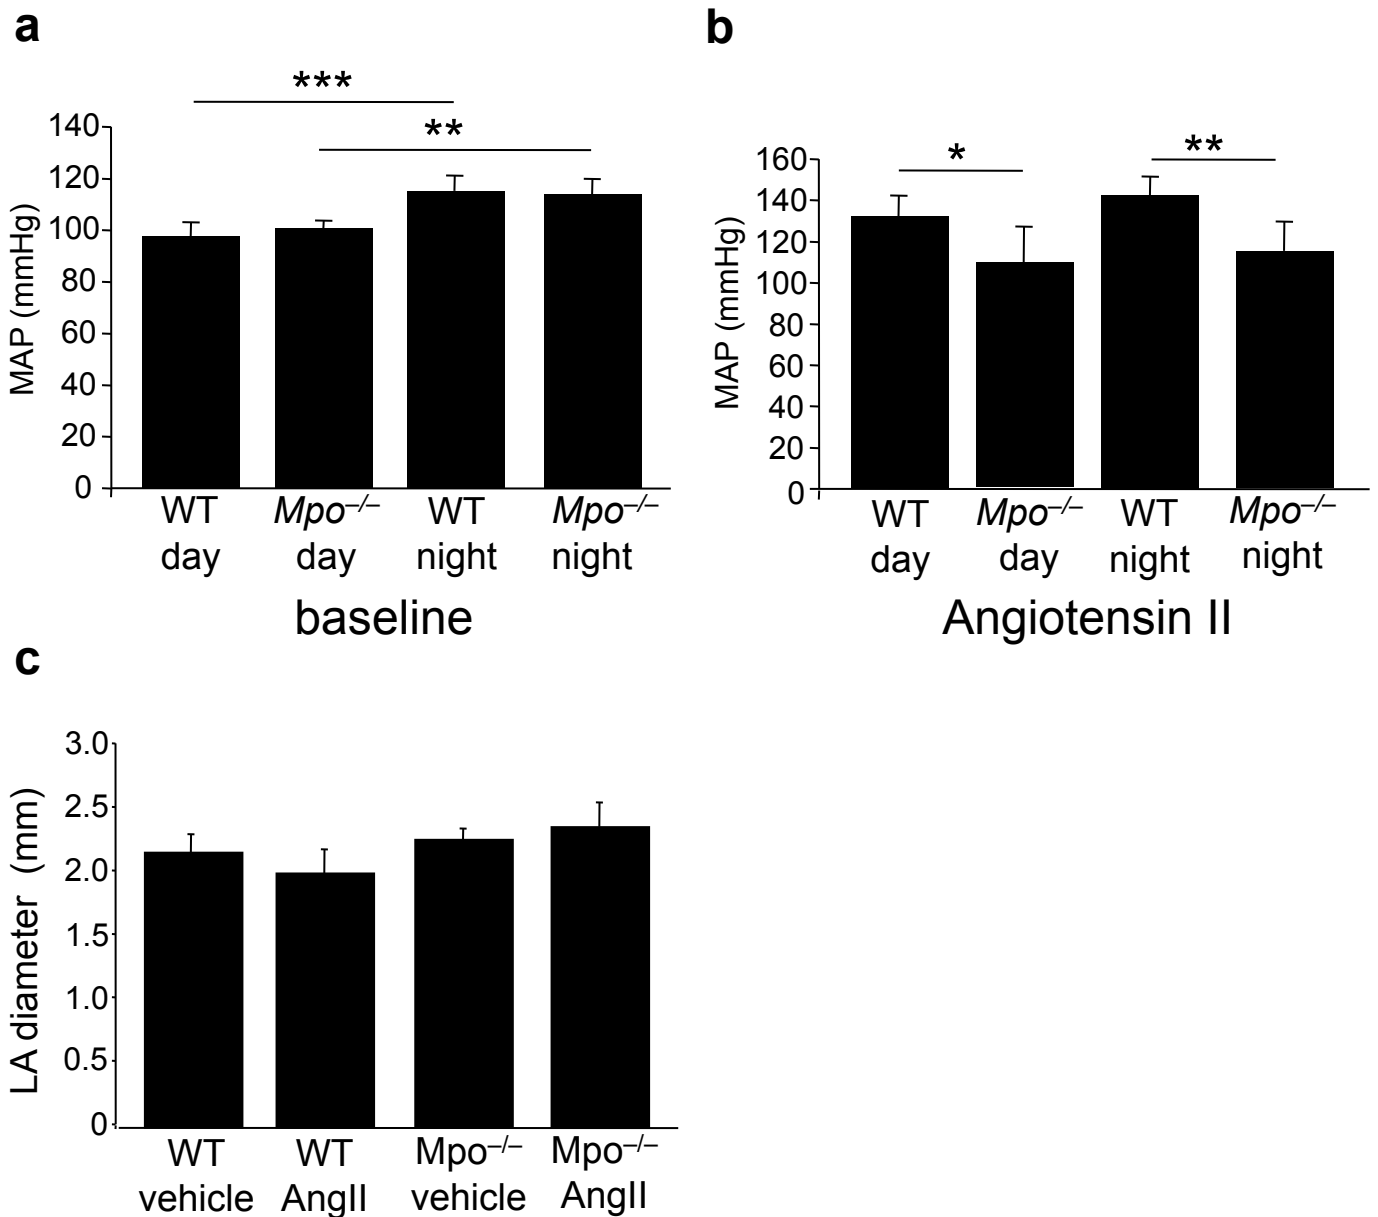

**Supplementary Figure 4.** (a) Continuous radiotelemetric blood pressure measurements in WT and *Mpo*<sup>-/-</sup> mice at baseline and (b) following AngII treatment. n=6-7, \*P<0.05, \*\*P<0.01, \*\*\*P<0.001. ANOVA. (c) Echocardiographic assessment of left atrial diameter in WT and *Mpo*<sup>-/-</sup> mice following saline (vehicle) or AngII treatment. n=8, P=non-significant. ANOVA for intergroup comparisons. Paired student's t-test for day to night difference. All data are expressed as means ± standard deviation.

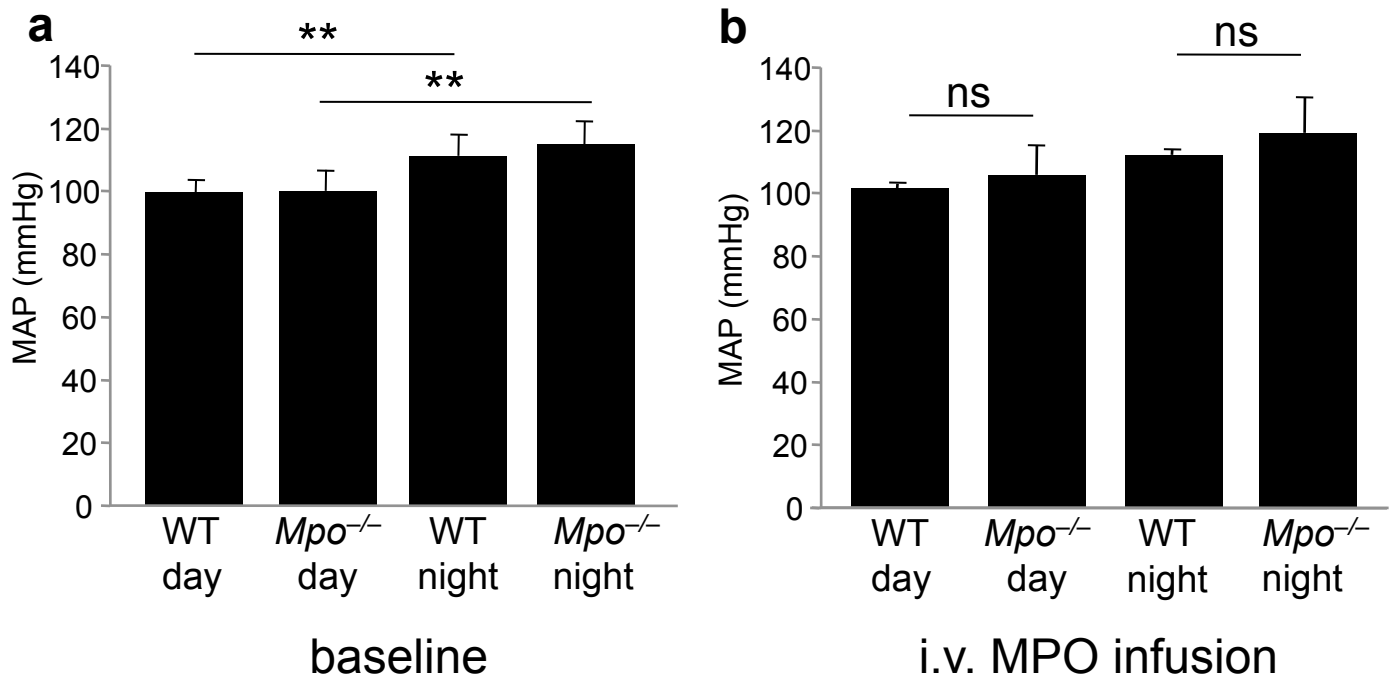

**Supplementary Figure 5. (a)** Continuous radiotelemetric blood pressure measurements in WT and *Mpo*<sup>-/-</sup> mice at baseline and **(b)** following continuous i.v. MPO treatment for 7 days. N=5-6. \*\*P<0.01. ns P>0.05. ANOVA for intergroup comparisons. Paired student's t-test for day to night difference. All data are expressed as means ± standard deviation.

**Supplementary Table 1**

Rodent electrophysiological parameters.

|                                                 | <b>WT vehicle<br/>(n=13)</b> | <b>WT AngII<br/>(n=16)</b> | <b><i>Mpo</i><sup>-/-</sup> vehicle<br/>(n=10)</b> | <b><i>Mpo</i><sup>-/-</sup> AngII<br/>(n=10)</b> |
|-------------------------------------------------|------------------------------|----------------------------|----------------------------------------------------|--------------------------------------------------|
| <b>Surface ECG</b>                              |                              |                            |                                                    |                                                  |
| Heart rate, min <sup>-1</sup>                   | 540.8 ± 41.0                 | 526.3 ± 57.1               | 504.1 ± 43.9                                       | 531.2 ± 55.13                                    |
| P, ms                                           | 10.8 ± 1.0                   | 14.1 ± 1.2 <sup>1,2</sup>  | 10.4 ± 0.8                                         | 11.2 ± 1.3 <sup>3</sup>                          |
| PQ, ms                                          | 41.2 ± 3.4                   | 40.7 ± 5.7                 | 38.6 ± 2.6                                         | 36.7 ± 3.0                                       |
| <b>Intracardiac ECG</b>                         |                              |                            |                                                    |                                                  |
| AH, ms                                          | 33.1 ± 3.5                   | 35.2 ± 6.3                 | 33.8 ± 8.9                                         | 28.7 ± 3.5                                       |
| AV, ms                                          | 40.7 ± 4.5                   | 43.0 ± 7.7                 | 41.8 ± 10.4                                        | 37.4 ± 3.8                                       |
| <b>EP stimulation</b>                           |                              |                            |                                                    |                                                  |
| SNRT, ms (S <sub>1</sub> S <sub>1</sub> 100 ms) | 154.0 ± 32.8                 | 169.6 ± 44.3               | 178.8 ± 32.7                                       | 168.3 ± 46.1                                     |
| ARP, ms (S <sub>1</sub> S <sub>1</sub> 100 ms)  | 19.2 ± 4.4                   | 19.3 ± 7.5                 | 17.0 ± 2.7                                         | 15.5 ± 6.9                                       |
|                                                 | <b>WT HSA<br/>(n=7)</b>      | <b>WT MPO<br/>(n=9)</b>    | <b><i>Mpo</i><sup>-/-</sup> HSA<br/>(n=6)</b>      | <b><i>Mpo</i><sup>-/-</sup> MPO<br/>(n=7)</b>    |
| <b>Surface ECG</b>                              |                              |                            |                                                    |                                                  |
| Heart rate, min <sup>-1</sup>                   | 486.9 ± 46.6                 | 496.2 ± 31.1               | 519.2 ± 57.4                                       | 545.8 ± 34.5                                     |
| P, ms                                           | 10.3 ± 1.0                   | 13.8 ± 1.9 <sup>4,5</sup>  | 11.0 ± 0.85                                        | 12.6 ± 1.3 <sup>6</sup>                          |
| PQ, ms                                          | 39.3 ± 4.2                   | 41.8 ± 5.4                 | 39.2 ± 3.3                                         | 39.4 ± 4.2                                       |
| <b>Intracardiac ECG</b>                         |                              |                            |                                                    |                                                  |
| AH, ms                                          | 34.0 ± 5.3                   | 36.6 ± 6.3                 | 31.8 ± 2.5                                         | 29.7 ± 3.8                                       |
| AV, ms                                          | 41.0 ± 6.3                   | 44.1 ± 7.3                 | 38.8 ± 2.5                                         | 37.1 ± 3.8                                       |
| <b>EP stimulation</b>                           |                              |                            |                                                    |                                                  |
| SNRT, ms (S <sub>1</sub> S <sub>1</sub> 100 ms) | 180.5 ± 55.5                 | 154.3 ± 30.3               | 147.8 ± 16.3                                       | 143.1 ± 19.7                                     |
| ARP, ms (S <sub>1</sub> S <sub>1</sub> 100 ms)  | 19.2 ± 2.0                   | 18.9 ± 3.3                 | 16.7 ± 2.9                                         | 16.4 ± 6.3                                       |

All data presented are mean ± standard deviation. EP, electrophysiological; SNRT, sinus node recovery time; ARP, atrial refractory period. <sup>1</sup>P<0.001 vs. WT vehicle, <sup>2</sup>P<0.001 vs. *Mpo*<sup>-/-</sup> vehicle, <sup>3</sup>P<0.05 vs. WT Ang II, <sup>4</sup>P<0.01 vs. WT HSA, <sup>5</sup>P<0.05 vs. *Mpo*<sup>-/-</sup> HSA, <sup>6</sup>P<0.05 vs. *Mpo*<sup>-/-</sup> HSA.

**Supplementary Table 2**

Patients' characteristics, analysis of plasma

|                                                      | <b>No AF</b><br>(n=18) | <b>AF</b><br>(n=24) | <b>p</b> |
|------------------------------------------------------|------------------------|---------------------|----------|
| <b>Females</b>                                       | 5(27.8)                | 8(33.3)             | 0.70     |
| <b>Age</b>                                           | 68.5±8.3               | 70.1±6.8            | 0.50     |
| <b>BMI</b>                                           | 24.2±7.0               | 24.0±5.4            | 0.94     |
| <b>Hypertension</b>                                  | 15(83.3)               | 21(87.5)            | 0.40     |
| <b>Hypercholesterolemia</b>                          | 10(55.5)               | 10(41.7)            | 0.28     |
| <b>Diabetes mellitus</b>                             | 2(11.1)                | 3(12.5)             | 0.89     |
| <b>Smoking</b>                                       | 0(0.0)                 | 0(0.0)              |          |
| <b>Family history</b>                                | 13(72.2)               | 13(54.2)            | 0.19     |
| <b>ASA</b>                                           | 7(38.9)                | 3(12.5)             | 0.05     |
| <b>Oral Anticoagulation</b>                          | 6(33.3)                | 19(79.2)            | <0.05    |
| <b>Betablocker</b>                                   | 6(33.3)                | 12(50.0)            | 0.28     |
| <b>ACE Inhibitor</b>                                 | 12(66.6)               | 10(41.7)            | 0.11     |
| <b>AT1 Inhibitor</b>                                 | 0(0.0)                 | 2(8.3)              | 0.21     |
| <b>Statin</b>                                        | 7(38.9)                | 8(33.3)             | 0.71     |
| <b>Hemoglobin, g/dL</b>                              | 14.4±0.9               | 14.0±1.3            | 0.22     |
| <b>Leukocyte count, 1000/<math>\mu</math>l</b>       | 5.8±1.1                | 5.8±1.4             | 0.99     |
| <b>Thrombocyte count 1000/<math>\mu</math>l</b>      | 284.2±50.1             | 257.9±61.5          | 0.15     |
| <b>Creatinine, mg/dL</b>                             | 1.0±0.5                | 1.1±0.2             | 0.41     |
| <b>Total cholesterol, mg/dL</b>                      | 211.3±27.6             | 193.8±38.7          | 0.11     |
| <b>LDL cholesterol, mg/dL</b>                        | 110.7±19.9             | 102.9±30.1          | 0.35     |
| <b>HDL cholesterol, mg/dL</b>                        | 71.0±15.6              | 63.0±16.8           | 0.12     |
| <b>Ejection fraction, %</b>                          | 51.9±9.0               | 49.3±8.7            | 0.38     |
| <b>Mitral Regurgitation, I</b>                       | 9(50.0)                | 12(50.0)            | 0.43     |
| <b>II</b>                                            | 2(11.1)                | 6(25.0)             |          |
| <b>Left atrial diameter, mm</b>                      | 44.2±4.3               | 44.4±4.8            | 0.91     |
| <b>Pacemaker intervention rate, min<sup>-1</sup></b> | 57.5±15.7              | 57.5±13.6           | 1.00     |

Values are given as n(%) or mean  $\pm$  standard deviation. ASA, acetylsalicylic acid; ACE, angiotensin-converting enzyme; AT1, angiotensin II type 1; BMI, body mass index; LDL, low density lipoprotein; HDL, high density lipoprotein.



### Supplementary Table 3

Patients' characteristics, analysis of atrial tissue

|                                 | No AF<br>(n=17) | AF<br>(n=10) | P     |
|---------------------------------|-----------------|--------------|-------|
| <b>Females</b>                  | 4(23.5)         | 4(40)        | 0.37  |
| <b>Age, years</b>               | 68.6±13.8       | 71.0±6.5     | 0.60  |
| <b>Hypertension</b>             | 10(58.8)        | 7(70.0)      | 0.69  |
| <b>Hypercholesterolemia</b>     | 6(35.3)         | 3(30.0)      | 0.78  |
| <b>Diabetes mellitus</b>        | 3(17.6)         | 2(20.0)      | 0.89  |
| <b>Smoking</b>                  | 5(29.4)         | 1(10.0)      | 0.36  |
| <b>ASA</b>                      | 14(82.4)        | 1(10.0)      | <0.05 |
| <b>Betablocker</b>              | 12(70.6)        | 4(40.0)      | 0.22  |
| <b>ACE Inhibitor</b>            | 10(58.8)        | 6(60.0)      | 0.95  |
| <b>Statin</b>                   | 13(76.5)        | 5(50.0)      | 0.22  |
| <b>Hemoglobin, g/dL</b>         | 13.6±1.9        | 13.0±1.2     | 0.41  |
| <b>Leukocyte count, 1000/ml</b> | 7.59±1.98       | 7.58±2.1     | 0.99  |
| <b>Creatinine, mg/dL</b>        | 1.16±0.36       | 1.14±0.41    | 0.86  |

Values are given as n(%) or mean ± standard deviation. ASA, acetylsalicylic acid; ACE, angiotensin-converting enzyme.
